# Supplementary material for: ErbB2 Pathway Activation upon Smad4 Loss Promotes Lung Tumor Growth and Metastasis
Source: PubMed Central journal article supplement — Cell Rep. Author manuscript; Available in PMC 2020 Aug 5. (PMC7405934; doi:10.1016/j.celrep.2015.02.014), 2015-03-05
Supplement: NIHMS783803-supplement-Erb2_Pathway_Suppl_material.pdf [file NIHMS783803-supplement-Erb2_Pathway_Suppl_material.pdf]

Cell Reports

Supplemental Information

## **ErbB2 Pathway Activation upon *Smad4* Loss Promotes Lung Tumor Growth and Metastasis**

Jian Liu, Sung-Nam Cho, Bindu Akkanti, Nili Jin, Jianqiang Mao, Weiwen Long, Tenghui Chen, Yiqun Zhang, Ximing Tang, Ignacio I. Wistub, Chad J. Creighton, Farrah Kheradmand, and Francesco J. DeMayo

# Supplemental Information

## SUPPLEMENTAL DATA

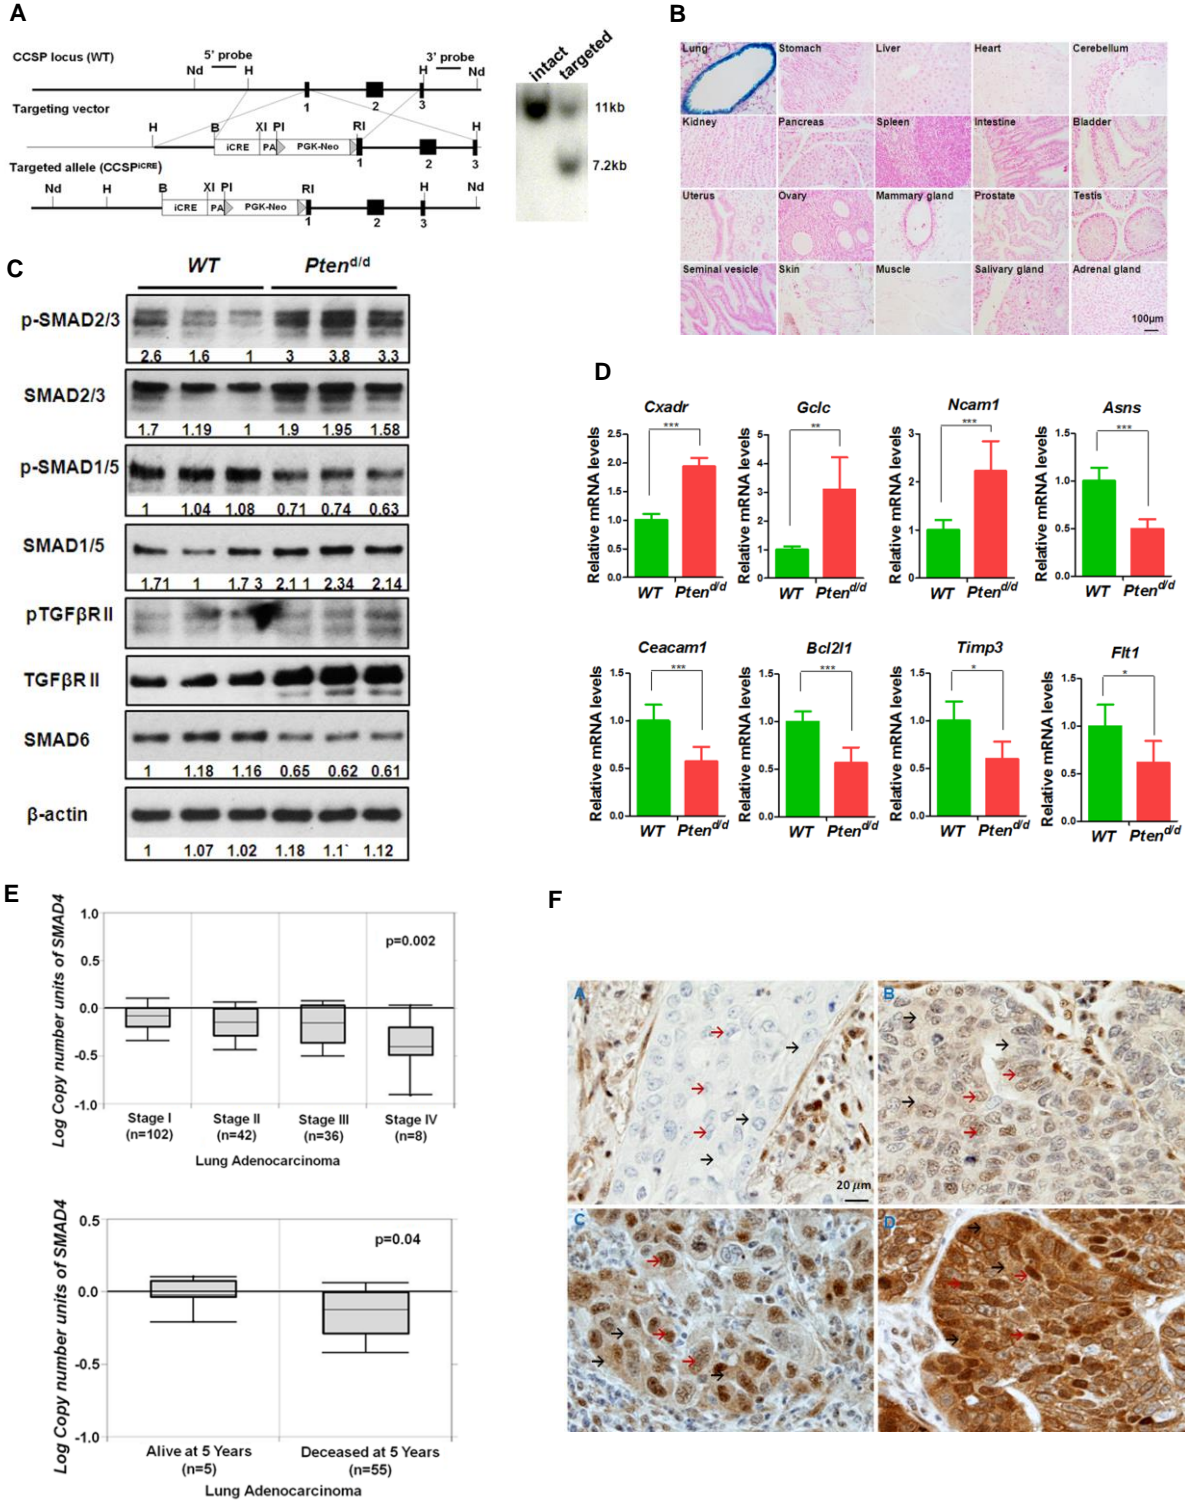

**Figure S1, related to Figure 1.**

(A) The targeting strategy to generate *CCSP<sup>Cre</sup>* mice. The *CCSP* WT locus contained the coding sequence exon 1-3 (black boxes) with the putative initiator methionine located at the beginning of exon 1. The targeting vector contained an improved Cre (iCre) recombinase gene sequence followed by SV40 PolyA and an inverted PGK-Neo-cassette flanked by FRT sites (triangle). The left and right arms had 2~3 kb of homologous sequence to *CCSP*. The external 5' probe (rectangle) was used in Southern blot analysis (right panel) of the targeted ES clones. Southern blot analysis showed that the targeted clones generated a novel 7.2 kb fragment different from the 11 kb intact WT fragment.

(B) Tissue distribution of iCre expression by X-gal staining. Tissues from 4-week-old *CCSP<sup>Cre</sup>/R26R* mice underwent X-gal staining. X-gal staining was not visible in any other tissues other than the lung.

(C) Western blot analysis of the TGF $\beta$ /BMP pathway in 7-month-old mouse lungs. The expression of phosphorylation of SMAD2/3 (p-SMAD2/3), SMAD1/5 and TGF $\beta$ RII increased in the *Pten<sup>d/d</sup>* mouse lungs when compared to that of wild type mouse lungs while SMAD6, the inhibitor of TGF $\beta$  pathway, and phosphorylation of SMAD1/5 (p-SMAD1/5) decreased in *Pten<sup>d/d</sup>* mouse lungs.

(D) RT-qPCR analysis of some of the significantly altered genes in the TGF $\beta$  pathway in the Microarray (*Pten<sup>d/d</sup>* vs. *WT*). Statistical analysis was performed using Student T-test (p value is \*p<0.05, \*\*p<0.01, and \*\*\*p<0.001). 6 lungs of wild type (WT) mice and of *Pten<sup>d/d</sup>* mice were analyzed.

(E) Copy number variations of *SMAD4* in TCGA Lung 2 array. Analysis of copy number of *SMAD4* in different stages of lung adenocarcinoma (upper panel); analysis of copy number of *SMAD4* between alive and dead lung adenocarcinoma patients (lower panel)

and Student T-test was utilized for all statistical analyses. These data indicated *SMAD4* copy number was lost in the human lung cancer development.

(F) Immunohistochemical analysis of *SMAD4* in lung cancer specimens. A different score (0-3) is given to each sample based on the intensity of staining signal in the cytoplasm (0-3) and nucleus (0-3). A final expression score (0–300) was obtained by multiplying the intensity and reactivity extension. Black arrows indicate cytoplasmic staining: “0” in A, “1+” in B, “2+” in C and “3+” in D. Red arrows indicate nuclear staining: “0” in A, “1+” in B, “2+” in C and “3+” in D.

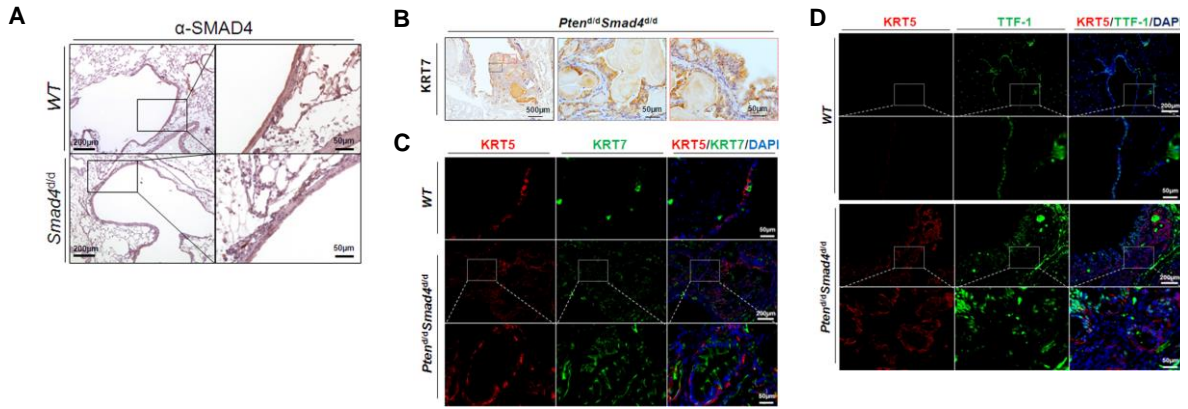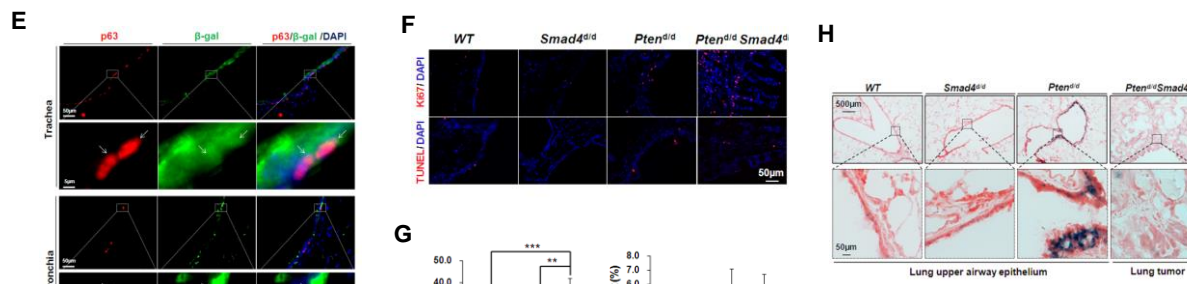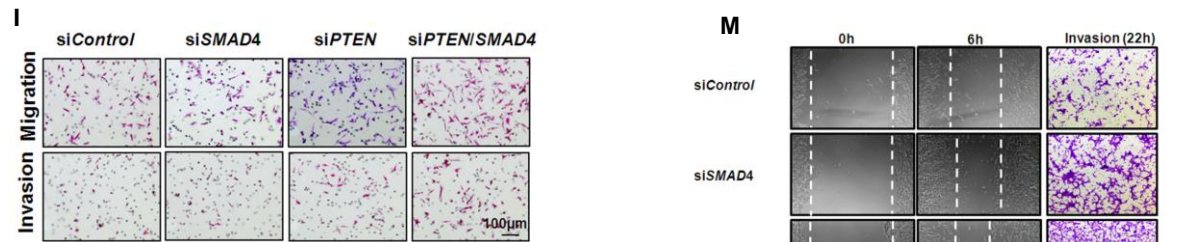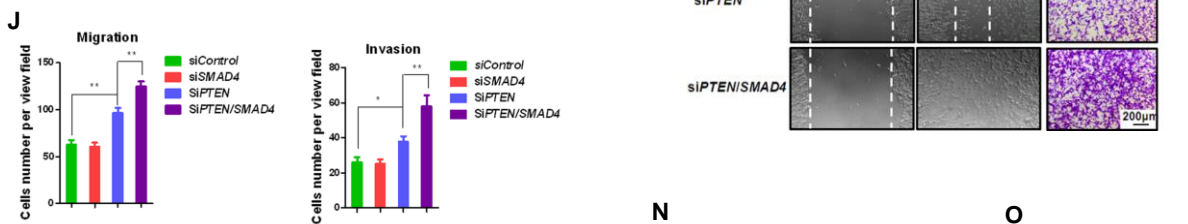

**Figure S2, related to Figure 2.**

(A) Immunohistochemical staining of SMAD4 in wild type and *Smad4*<sup>d/d</sup> mouse lungs. SMAD4 staining is present in the epithelium (brown staining) of wild type mice but lost in the epithelium *Smad4*<sup>d/d</sup> mice.

(B) Immunohistochemical staining of the lung adenocarcinoma marker KRT7 in *Pten*<sup>d/d</sup>*Smad4*<sup>d/d</sup> mouse tumors. The regions labeled by black or red dash boxes represent magnified tumor epithelium shown in adjacent panels.

(C) Immunofluorescence of KRT5 and KRT7 in wild type mouse lungs and *Pten*<sup>d/d</sup>*Smad4*<sup>d/d</sup> mouse tumors. Boxed areas are magnified in the panels directly below.

(D) Immunofluorescence of KRT5 and TTF1 in wild type mouse lungs and *Pten*<sup>d/d</sup>*Smad4*<sup>d/d</sup> mouse tumors. Boxed areas are magnified in the panels directly below.

(E) Immunofluorescence of p63 and  $\beta$ -Gal ( $\beta$ -galactosidase) in *CCSP*<sup>iCre</sup>/R26R reporter mouse lungs. The white arrows indicate the cells coexpressing p63 and  $\beta$ -Gal in upper trachea and bronchia. Boxed areas are magnified in the panels directly below.

(F and G) Ki-67 and TUNEL staining were performed on lung sections from wild type, *Smad4*<sup>d/d</sup>, *Pten*<sup>d/d</sup> and *Pten*<sup>d/d</sup>*Smad4*<sup>d/d</sup> mice. Each assay was quantified by counting positive nuclei of epithelial cells. All quantitative data (G) were obtained from three to five mice per group. Statistical analysis was performed using one-way ANOVA (p value is \*p<0.05, \*\*p<0.01, and \*\*\*p<0.001). Cell proliferation significantly increased in the *Pten*<sup>d/d</sup>*Smad4*<sup>d/d</sup> mice when compared to other three groups.

(H) SA-b-galactosidase ( $\beta$ -Gal) staining of 10-month old mouse lungs and lung tumors. SA-b-galactosidase ( $\beta$ -Gal) (blue staining) is a senescence marker. Boxed areas are magnified in the panels directly below.

(I and J) Two-chamber migration/invasion assays of Beas-2B cells after knock-down of *PTEN* and/or *SMAD4*. (J) Statistical analysis of the results (I) using one-way ANOVA (p value is \*p<0.05, \*\*p<0.01).

(K) RT-qPCR analysis of the knock-down of *PTEN* and *SMAD4* in Beas-2B cells. Statistical analysis was performed using one-way ANOVA (p value is \*p<0.05, \*\*p<0.01, and \*\*\*p<0.001). It indicated there was sufficient knock-down of *PTEN* and *SMAD4* in Beas-2B cells.

(L) MTT assay of cell viability in Beas-2B cells after knock-down of *PTEN* and *SMAD4*. Statistical analysis was performed using one-way ANOVA (p value is \*p<0.05, \*\*p<0.01, and \*\*\*p<0.001).

(M) Scratch/wound healing assay and invasion analysis of the NL20 cells' migration and invasion, respectively, after knock-down of *PTEN* and *SMAD4*.

(N) RT-qPCR analysis showed the knockdown efficiency of *PTEN* and *SMAD4* in NL20 cells.

(O) MTT assay of cell viability in NL20 cells after knockdown of *PTEN* and *SMAD4*.

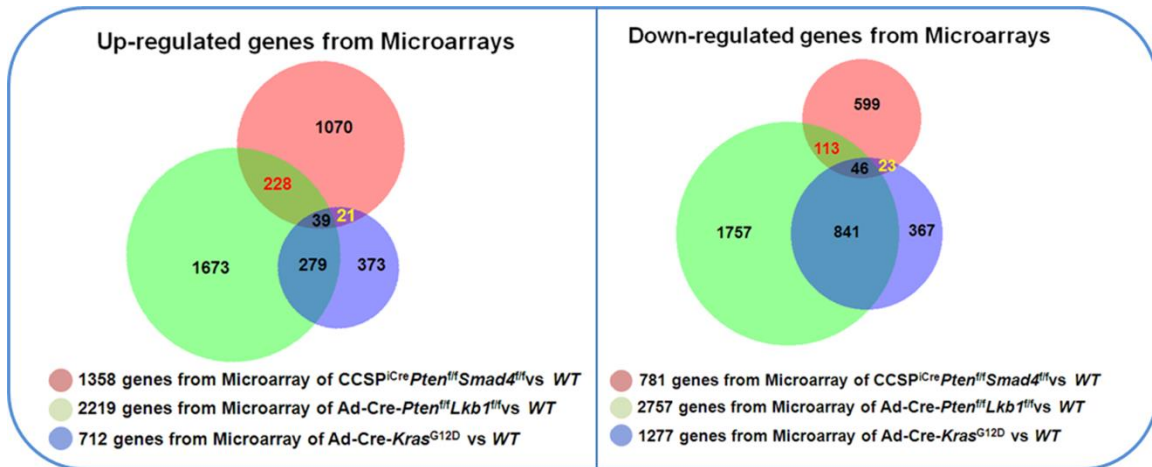

**Figure S3, related to Figure 3.**

Comparison of the significantly changed genes ( $p < 0.01$ , fold change (log-transformed data)  $> 1.4$ ) in the lung tumors of mice with CCSP<sup>iCre</sup> ablation of *Pten* and *Smad4* (red), Adenoviral deletion of *Pten* and *Lkb1* (green) and Adenoviral Cre activation of *Kras*<sup>G12D</sup> (blue). The microarrays of Ad-Cre-*Pten*<sup>ff</sup>*Lkb1*<sup>ff</sup> and Ad-Cre-*Kras*<sup>G12D</sup> are from the GSE54353 dataset.



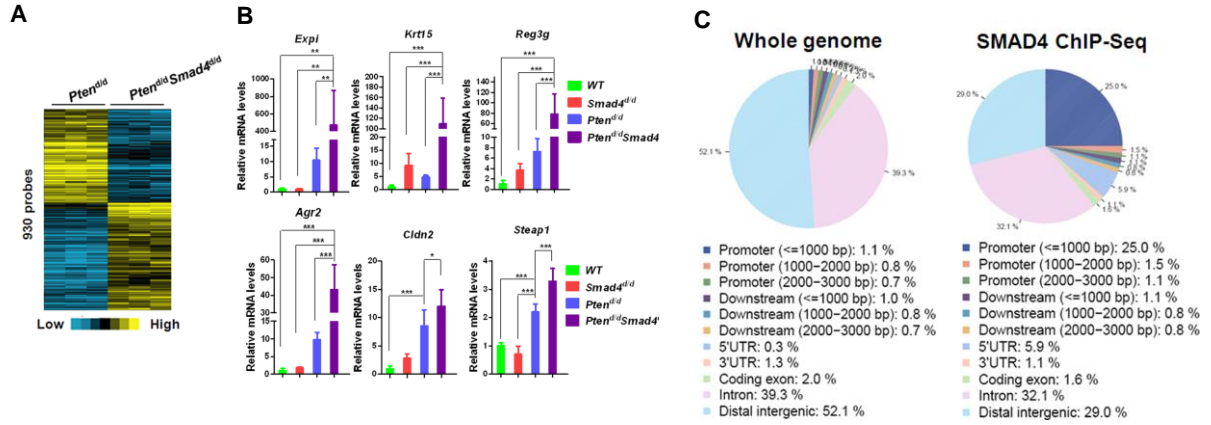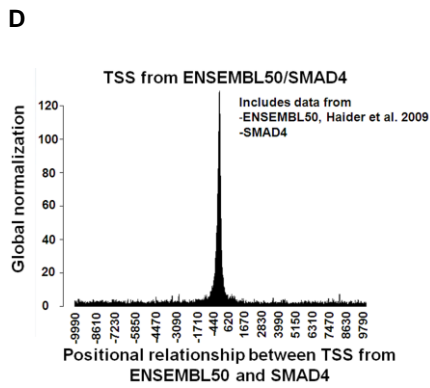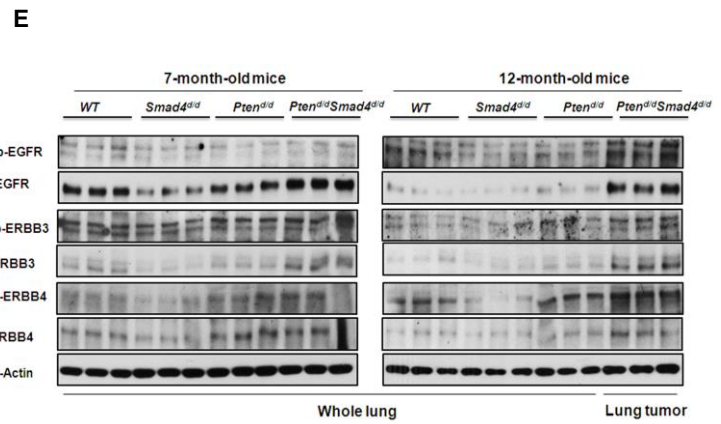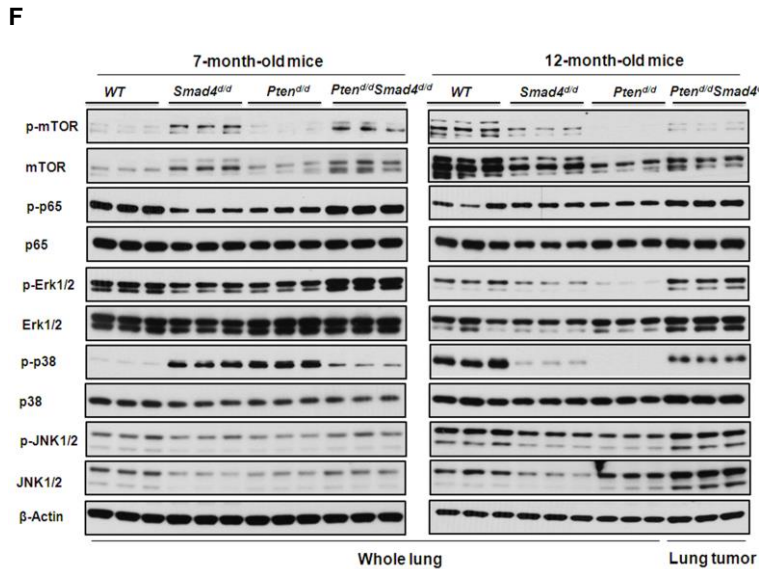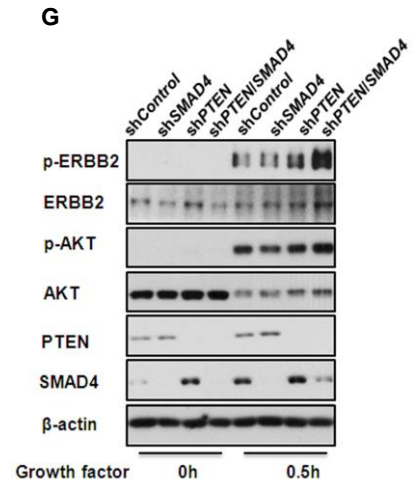

**Figure S4, related to Figure 4.**

(A) The heatmap for the 744 differentially regulated genes (930 probes) in the Microarray analysis of lungs from 7-month-old *Pten*<sup>d/d</sup>*Smad4*<sup>d/d</sup> mice when compared to *Pten*<sup>d/d</sup> mice. 6 lungs of *Pten*<sup>d/d</sup> mice and 6 lungs of *Pten*<sup>d/d</sup>*Smad4*<sup>d/d</sup> mice were analyzed.

(B) RT-qPCR analysis of 6 significantly changed genes in the Microarray (*Pten*<sup>d/d</sup>*Smad4*<sup>d/d</sup> vs. *Pten*<sup>d/d</sup>). Statistical analysis was performed using one-way ANOVA (p value is \*p<0.05, \*\*p<0.01, and \*\*\*p<0.001). 6 lungs of *Pten*<sup>d/d</sup> mice and 6 lungs of *Pten*<sup>d/d</sup>*Smad4*<sup>d/d</sup> mice were analyzed.

(C and D) Cistromic (C) and ChIP-Seq online (<http://ccq.vital-it.ch/chipseq/>) (D) analyses of SMAD4 ChIP-Seq data of 7-month-old *Pten*<sup>d/d</sup> mouse lungs. Both analyses demonstrate that SMAD4 binding in the whole genome is majorly located in the proximal promoter regions of genes.

(E) Western blot analysis of total and phosphorylated proteins of EGFR, ERBB3 and ERBB4 in mouse lungs and lung tumors.

(F) Western blot analysis of mTOR and MAPK pathways in mouse lungs and lung tumors.

(G) Western blot analysis of phosphorylations of ERBB2 and AKT in BEAS-2B cells after double knock-down of *PTEN* and *SMAD4* with or without the treatment of growth factors.

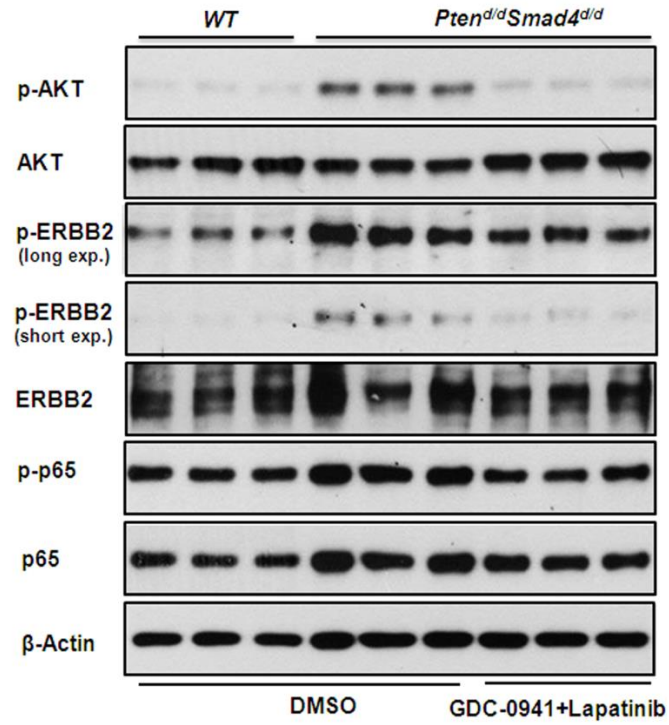

**Figure S5, related to Figure 5.**

Western blot analysis of the inhibition of GDC-0941 and Lapatinib on the phosphorylations of ERBB2/AKT in mouse lungs. Phosphorylation of p65 (p-p65), which is not effected by the treatment, serves as a negative control.

**A**

**12-month-old mouse tumor Microarray**  
(*Pten<sup>did</sup>Smad4<sup>did</sup>* vs *WT*)

| Gene symbol  | Fold change | P value |
|--------------|-------------|---------|
| <i>Errf1</i> | 0.36        | 0.0059  |

**B**

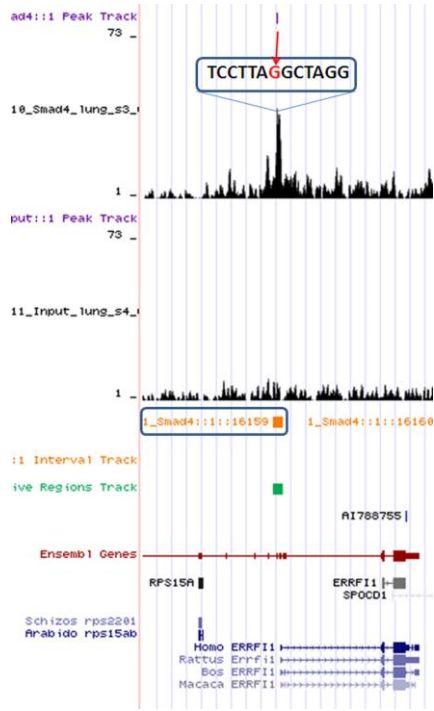

**C**

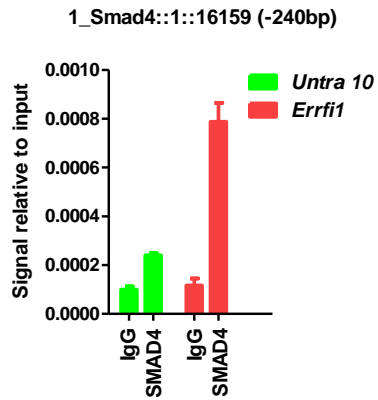

**D**

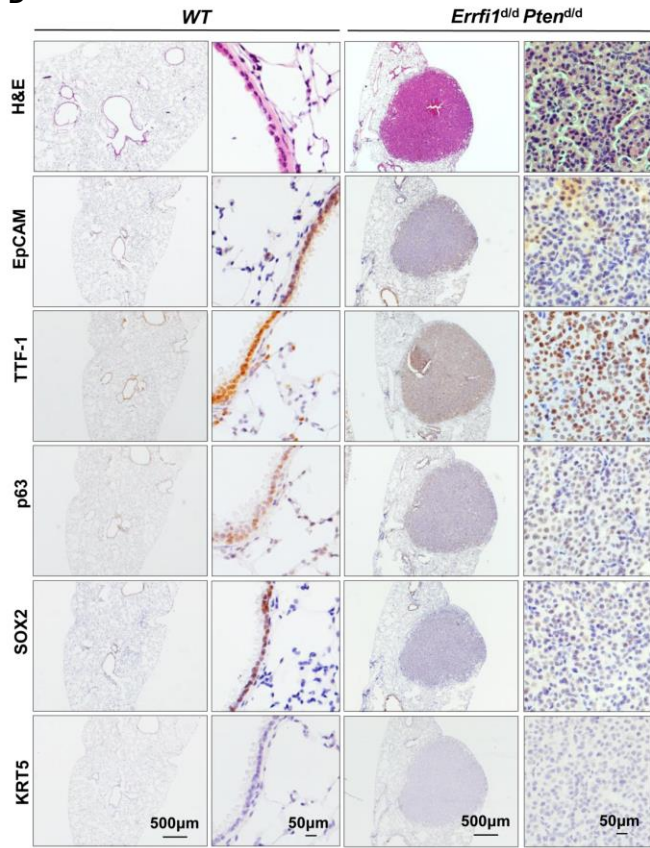

**E**

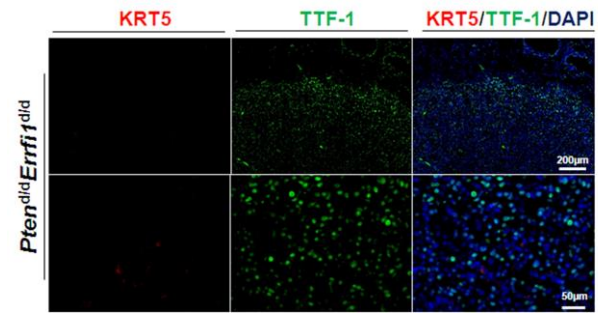

**F**

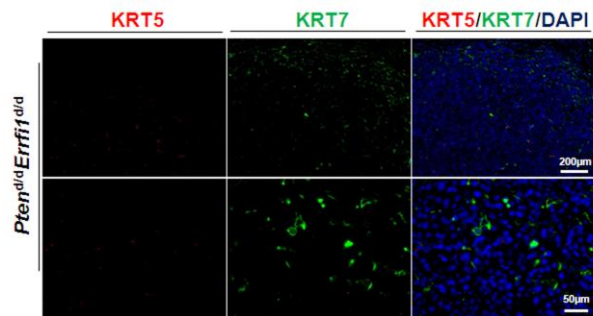

**Figure S6, related to Figure 6.**

(A) The change of *Errfi1* expression was identified in the gene Microarray analysis of *Pten<sup>d/d</sup>/Smad4<sup>d/d</sup>* mouse tumors vs wild type mouse lungs.

(B and C) Analysis of SMAD4 binding on the *Errfi1* proximal promoter region. (B) The sketch map of peak position of SMAD4 binding on the *Errfi1* proximal promoter region identified in SMAD4 ChIP-Seq analysis of 7-month-old *Pten<sup>d/d</sup>* mouse lungs. (C) ChIP-qPCR analysis of SMAD4 binding on *Errfi1* promoter region in 7-month-old *Pten<sup>d/d</sup>* mouse lungs. The primers for *Untra 10* (non-relevant control) target the untranslated region 10.

(D) Immunohistochemical staining of differential markers in wild type mouse lungs and *Errfi1<sup>d/d</sup>Pten<sup>d/d</sup>* mouse lungs. The positive staining for TTF1 (ADC marker) and negative staining for p63/KRT5/SOX2 (SCC marker) indicated the lung tumor in *Errfi1<sup>d/d</sup>Pten<sup>d/d</sup>* belongs to adenocarcinoma.

(E and F) Immunofluorescent staining of *Errfi1<sup>d/d</sup>Pten<sup>d/d</sup>* mouse tumors. Negative staining of KRT5 and positive staining of TTF1 (F) and KRT7 (G) indicated that *Errfi1<sup>d/d</sup>Pten<sup>d/d</sup>* mouse tumors belong to adenocarcinoma.

**A**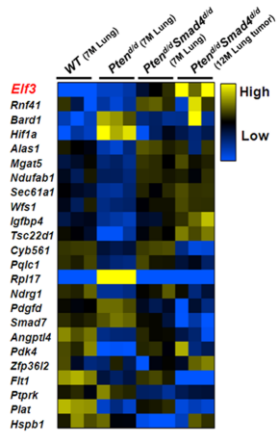**B**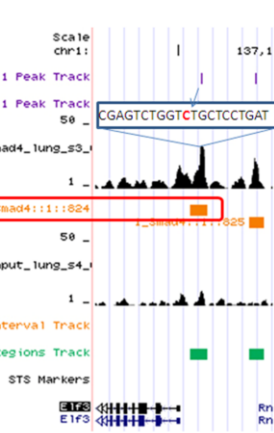**C**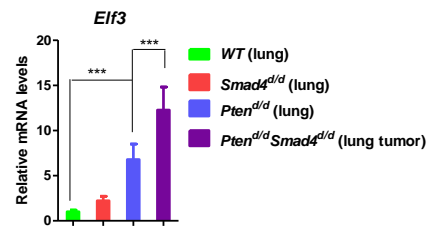**D**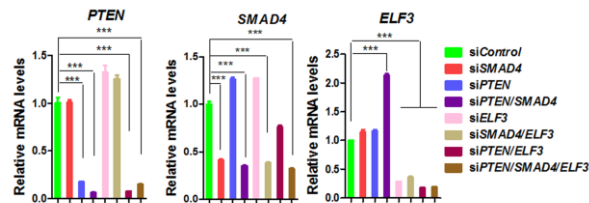**E**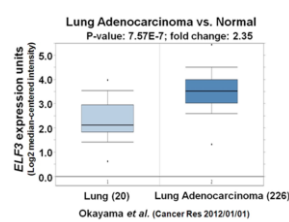**F**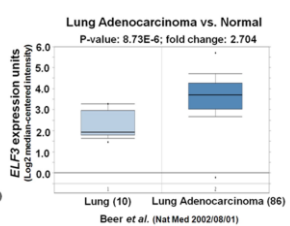**G**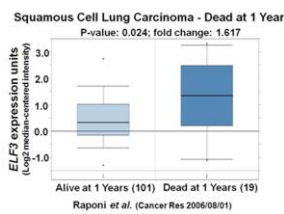**H**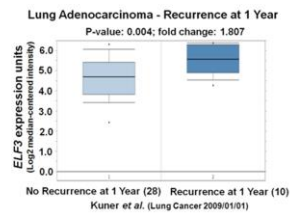**I**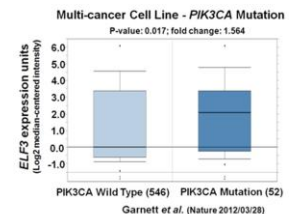**J**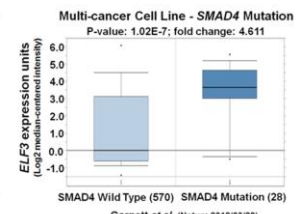**K**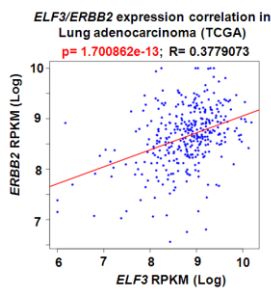**L**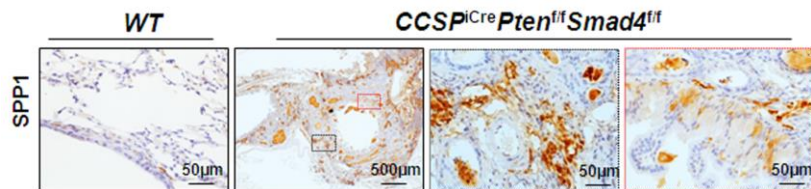

**Figure S7, related to Figure 7.**

(A) The gene list of ErbB2 pathway revealed by the Ingenuity knowledge-based analysis on 235 intersection genes. In the ErbB2 pathway, *Elf3* was found to be the top changed gene and showed continuously increased expression from wild type group to lung tumor groups.

(B) The sketch map of peak position of SMAD4 binding on the *Elf3* proximal promoter region identified in SMAD4 ChIP-Seq.

(C) RT-qPCR analysis of *Elf3* mRNA expression in 12-month-old wild type, *Smad4<sup>d/d</sup>*, *Pten<sup>d/d</sup>* and *Pten<sup>d/d</sup>Smad4<sup>d/d</sup>* mice. Statistical analysis was performed using one-way ANOVA (p value is \*p<0.05, \*\*p<0.01, and \*\*\*p<0.001). 3 lungs of wild type (WT) mice and 3 lung tumors of *Pten<sup>d/d</sup>Smad4<sup>d/d</sup>* mice were analyzed.

(D) RT-qPCR analysis of the knockdown efficiency of *PTEN*, *SMAD4* and *ELF3* in BEAS-2B cells. Statistical analysis was performed using one-way ANOVA (p value is \*p<0.05, \*\*p<0.01, and \*\*\*p<0.001).

(E and F) Oncomine boxed plot of *ELF3* mRNA expression in lung adenocarcinoma.

(G) Oncomine boxed plot of *ELF3* mRNA expression in tumors of squamous cell lung carcinoma patients alive or dead at 1 year.

(H) Oncomine boxed plot of *ELF3* mRNA expression in lung adenocarcinoma patients with or without recurrence.

(I and J) Oncomine boxed plots of *ELF3* mRNA expression in human cancer cell lines. *ELF3* mRNA expression was shown to be upregulated in PIK3CA mutated cancer cell lines (I) and in SMAD4 mutated cancer cell lines (J).

(K) Correlation analysis of *ELF3* mRNA expression and *ERBB2* mRNA expression in lung adenocarcinomas from TCGA dataset. Mean expression values of *ELF3* and *ERBB2* were calculated across all investigated patients. The relative expression was

calculated by normalizing the expression value in each patient to the mean expression value.

(L) Immunohistochemical staining of SPP1 in wild type mouse lungs and *Pten*<sup>d/d</sup>*Smad4*<sup>d/d</sup> mouse tumors. The regions labeled by black or red dash boxes represent magnified tumor epithelium in adjacent panels.



## SUPPLEMENTAL TABLES

Table S1, related to Figure 1

The Gene list in TGFβ1 pathway from the Microarray analysis (*Pten*<sup>d/d</sup> vs. WT)

### Up-regulated genes (67)

|                |               |               |               |                |                 |                  |
|----------------|---------------|---------------|---------------|----------------|-----------------|------------------|
| <i>Abi2</i>    | <i>Casp1</i>  | <i>Fzd2</i>   | <i>Kcnmb1</i> | <i>Ncam1</i>   | <i>Ppp1r14d</i> | <i>Tfrc</i>      |
| <i>Acly</i>    | <i>Casp4</i>  | <i>Gclc</i>   | <i>Klk11</i>  | <i>Nek2</i>    | <i>Prom1</i>    | <i>Tmem17</i>    |
| <i>Adam19</i>  | <i>Cdkn2b</i> | <i>Ggt6</i>   | <i>Krt19</i>  | <i>Nit1</i>    | <i>Ptprk</i>    | <i>Tnfrsf11a</i> |
| <i>Adora2b</i> | <i>Cks2</i>   | <i>Gja1</i>   | <i>Ldlr</i>   | <i>Npas2</i>   | <i>Rere</i>     | <i>Unc119</i>    |
| <i>Afp</i>     | <i>Clu</i>    | <i>Gnaz</i>   | <i>Lrba</i>   | <i>Pfn2</i>    | <i>Sccpdh</i>   | <i>Wisp1</i>     |
| <i>Agtr2</i>   | <i>Ctsc</i>   | <i>Gsta4</i>  | <i>Lta4h</i>  | <i>Pi4k2b</i>  | <i>Sdc1</i>     | <i>Wnt4</i>      |
| <i>B3galt2</i> | <i>Cxadr</i>  | <i>Hif1a</i>  | <i>Mef2c</i>  | <i>Pla2g4a</i> | <i>Slc39a8</i>  | <i>Wnt5a</i>     |
| <i>Bsg</i>     | <i>Dsg2</i>   | <i>Hnmt</i>   | <i>Mmp11</i>  | <i>Porcn</i>   | <i>Sstr2</i>    |                  |
| <i>Calml3</i>  | <i>Elf3</i>   | <i>Hs6st2</i> | <i>Muc4</i>   | <i>Pou4f1</i>  | <i>Tcf12</i>    |                  |
| <i>Calml4</i>  | <i>Fgfr2</i>  | <i>Idi1</i>   | <i>Myb</i>    | <i>Ppfibp2</i> | <i>Tert</i>     |                  |

### Down-regulated genes (80)

|                 |                 |               |               |                 |                 |                |
|-----------------|-----------------|---------------|---------------|-----------------|-----------------|----------------|
| <i>Ace</i>      | <i>Ccbp2</i>    | <i>Fas</i>    | <i>Itgb1</i>  | <i>Mthfd2</i>   | <i>Rapgef3</i>  | <i>Solh</i>    |
| <i>Acvr11</i>   | <i>Cd163</i>    | <i>Flt1</i>   | <i>Itgb3</i>  | <i>Nfib</i>     | <i>Rb1</i>      | <i>Sphk1</i>   |
| <i>Adm</i>      | <i>Cdc42ep4</i> | <i>Fndc3b</i> | <i>Klf15</i>  | <i>Nnmt</i>     | <i>Rbms3</i>    | <i>Tgfbr3</i>  |
| <i>Aldh18a1</i> | <i>Ceacam1</i>  | <i>Foxo1</i>  | <i>Klf9</i>   | <i>Npr1</i>     | <i>Rhoc</i>     | <i>Tgm2</i>    |
| <i>Aldh2</i>    | <i>Clic4</i>    | <i>Gfap</i>   | <i>Kpna3</i>  | <i>Nup62</i>    | <i>Rora</i>     | <i>Timp3</i>   |
| <i>Angptl4</i>  | <i>Cnn3</i>     | <i>Gfpt2</i>  | <i>Lox</i>    | <i>Pdlim7</i>   | <i>Sema7a</i>   | <i>Tsc22d1</i> |
| <i>Asns</i>     | <i>Col4a6</i>   | <i>Ggps1</i>  | <i>Ltbp1</i>  | <i>Pecam1</i>   | <i>Shoc2</i>    | <i>Ust</i>     |
| <i>Atf4</i>     | <i>Cyb561</i>   | <i>Gria1</i>  | <i>Maf</i>    | <i>Plaur</i>    | <i>Sirpa</i>    | <i>Wdfy3</i>   |
| <i>Bcl2l1</i>   | <i>Cyp3a13</i>  | <i>Ifrd1</i>  | <i>Map2k3</i> | <i>Plod2</i>    | <i>Ski</i>      |                |
| <i>Bin1</i>     | <i>Disp2</i>    | <i>Igfbp4</i> | <i>Mbd1</i>   | <i>Ppp1r13b</i> | <i>Slc39a14</i> |                |
| <i>Calca</i>    | <i>Ece1</i>     | <i>Itga5</i>  | <i>Mbnl2</i>  | <i>Prkca</i>    | <i>Slc7a1</i>   |                |
| <i>Cars</i>     | <i>Ercc5</i>    | <i>Itga6</i>  | <i>Mfap2</i>  | <i>Ptk2</i>     | <i>Smurf2</i>   |                |



**Table S3, related to Figure 3**

**The Genes related to cell movement identified from the *Pten<sup>d/d</sup>Smad4<sup>d/d</sup>* (tumor) vs WT (lung) Microarray**

**Up-regulated genes (170)**

|                |               |               |                 |                |                 |                 |
|----------------|---------------|---------------|-----------------|----------------|-----------------|-----------------|
| <i>Abcc1</i>   | <i>Crh</i>    | <i>Fhit</i>   | <i>Irf6</i>     | <i>Mmp3</i>    | <i>Rin1</i>     | <i>Tacstd2</i>  |
| <i>Adam8</i>   | <i>Ctnn</i>   | <i>Fhl2</i>   | <i>Irf7</i>     | <i>Mst1</i>    | <i>Ropn1l</i>   | <i>Tbx1</i>     |
| <i>Adra2a</i>  | <i>Cxcl14</i> | <i>Flnb</i>   | <i>Itga4</i>    | <i>Muc4</i>    | <i>Runx1</i>    | <i>Tekt4</i>    |
| <i>Agr2</i>    | <i>Darc</i>   | <i>Foxa1</i>  | <i>Itgav</i>    | <i>Mx1</i>     | <i>Ruvbl1</i>   | <i>Tgfbi</i>    |
| <i>Alox15</i>  | <i>Dbn1</i>   | <i>Foxc1</i>  | <i>Itgb4</i>    | <i>Myo5b</i>   | <i>S100a14</i>  | <i>Thbs2</i>    |
| <i>Aqp4</i>    | <i>Dcn</i>    | <i>Foxj1</i>  | <i>Jam3</i>     | <i>Neo1</i>    | <i>S100a6</i>   | <i>Tirap</i>    |
| <i>Bmx</i>     | <i>Dmp1</i>   | <i>Frk</i>    | <i>Klf5</i>     | <i>Ngfr</i>    | <i>S100b</i>    | <i>Tnfaip8</i>  |
| <i>Brms1</i>   | <i>Dnajb4</i> | <i>Fscn1</i>  | <i>Krt19</i>    | <i>Nlrp10</i>  | <i>Scn5a</i>    | <i>Tnfrsf4</i>  |
| <i>Bsg</i>     | <i>Dnm2</i>   | <i>Fst</i>    | <i>Krt6a</i>    | <i>Nqo2</i>    | <i>Selp</i>     | <i>Tnfsf11</i>  |
| <i>C5ar1</i>   | <i>Dpysl3</i> | <i>Gas8</i>   | <i>Krt8</i>     | <i>Ntrk3</i>   | <i>Serpib2</i>  | <i>Tnni3</i>    |
| <i>Calml3</i>  | <i>Dst</i>    | <i>Gata6</i>  | <i>L1cam</i>    | <i>Pa2g4</i>   | <i>Serpib5</i>  | <i>Tpm1</i>     |
| <i>Ccl20</i>   | <i>Ebf1</i>   | <i>Gcnt1</i>  | <i>Lif</i>      | <i>Pak1</i>    | <i>Serpinf1</i> | <i>Traf3ip2</i> |
| <i>Cd24a</i>   | <i>Ebf3</i>   | <i>Gna12</i>  | <i>Ligl1</i>    | <i>Parva</i>   | <i>Sfrp1</i>    | <i>Traf4</i>    |
| <i>Cdcp1</i>   | <i>Efna5</i>  | <i>Gnaz</i>   | <i>Lmcd1</i>    | <i>Pcsk6</i>   | <i>Shc4</i>     | <i>Tubb2b</i>   |
| <i>Cdh13</i>   | <i>Egln3</i>  | <i>Gpc1</i>   | <i>Lrig1</i>    | <i>Pex7</i>    | <i>Six1</i>     | <i>Twist1</i>   |
| <i>Ceacam1</i> | <i>Elf3</i>   | <i>Grid2</i>  | <i>Lum</i>      | <i>Pla2g3</i>  | <i>Skp2</i>     | <i>Tyro3</i>    |
| <i>Chl1</i>    | <i>Entpd5</i> | <i>Guca2a</i> | <i>Ly6d</i>     | <i>Pln</i>     | <i>Slc12a2</i>  | <i>Umod</i>     |
| <i>Cib1</i>    | <i>Ephb2</i>  | <i>Has2</i>   | <i>Madcam</i>   | <i>Prdm1</i>   | <i>Slc9a3r1</i> | <i>Vangl1</i>   |
| <i>Cldn3</i>   | <i>Eps8</i>   | <i>Hdc</i>    | <i>Mapk10</i>   | <i>Prkg1</i>   | <i>Spa17</i>    | <i>Vtcn1</i>    |
| <i>Cldn4</i>   | <i>ErbB2</i>  | <i>Hoxa1</i>  | <i>Marcks11</i> | <i>Ptges</i>   | <i>Spag16</i>   | <i>Wnt11</i>    |
| <i>Cldn7</i>   | <i>F2r11</i>  | <i>Ift88</i>  | <i>Mark1</i>    | <i>Ptn</i>     | <i>Spag6</i>    |                 |
| <i>Clu</i>     | <i>F3</i>     | <i>Igf2r</i>  | <i>Matn2</i>    | <i>Ptp4a1</i>  | <i>Spdef</i>    |                 |
| <i>Cmtm8</i>   | <i>Fbln1</i>  | <i>Igfbp3</i> | <i>Mbp</i>      | <i>Ptprz1</i>  | <i>St14</i>     |                 |
| <i>Col17a1</i> | <i>Fbln2</i>  | <i>Igfbp4</i> | <i>Mgat3</i>    | <i>Ramp1</i>   | <i>Stk38l</i>   |                 |
| <i>Comp</i>    | <i>Fgf13</i>  | <i>Ikkg</i>   | <i>Mmp15</i>    | <i>Rhobtb2</i> | <i>Tac1</i>     |                 |

### Down-regulated genes (151)

|                |               |                |                |               |                |                |
|----------------|---------------|----------------|----------------|---------------|----------------|----------------|
| <i>Ace</i>     | <i>Cd99</i>   | <i>F10</i>     | <i>Itgax</i>   | <i>Nfic</i>   | <i>Rabep1</i>  | <i>Tfpi</i>    |
| <i>Acp5</i>    | <i>Chi3l1</i> | <i>Fblim1</i>  | <i>Itgb2</i>   | <i>Nod1</i>   | <i>Rap2a</i>   | <i>Tgfb1</i>   |
| <i>Acvr1l1</i> | <i>Cklf</i>   | <i>Fcer1g</i>  | <i>Itgb6</i>   | <i>Nox4</i>   | <i>Rapgef3</i> | <i>Tie1</i>    |
| <i>Adam17</i>  | <i>Cldn1</i>  | <i>Fgf7</i>    | <i>Jun</i>     | <i>Npr1</i>   | <i>Rarres1</i> | <i>Timp3</i>   |
| <i>Akt3</i>    | <i>Clec1b</i> | <i>Fgfr4</i>   | <i>Kit</i>     | <i>Nrp2</i>   | <i>Reck</i>    | <i>Tjp1</i>    |
| <i>Apba1</i>   | <i>Clec5a</i> | <i>Fhod1</i>   | <i>Lcp1</i>    | <i>Oprm1</i>  | <i>Robo4</i>   | <i>Tlr2</i>    |
| <i>Arf4</i>    | <i>Cnr2</i>   | <i>Figf</i>    | <i>Ldlr</i>    | <i>Pdgfra</i> | <i>Rora</i>    | <i>Tlr7</i>    |
| <i>Arhgef6</i> | <i>Csf1</i>   | <i>Gab1</i>    | <i>Lims1</i>   | <i>Pecam1</i> | <i>Rps6ka5</i> | <i>Tnfrsf9</i> |
| <i>Arrb1</i>   | <i>Csf2ra</i> | <i>Gab2</i>    | <i>Lrpap1</i>  | <i>Plxnc1</i> | <i>Rps6ka6</i> | <i>Tns1</i>    |
| <i>B3gnt1</i>  | <i>Ctsd</i>   | <i>Git2</i>    | <i>Map3k11</i> | <i>Pmp22</i>  | <i>Saa1</i>    | <i>Trem2</i>   |
| <i>Bmpr2</i>   | <i>Ctsk</i>   | <i>Gna13</i>   | <i>Map3k8</i>  | <i>Podxl</i>  | <i>Sdc3</i>    | <i>Trpc1</i>   |
| <i>Braf</i>    | <i>Ctsz</i>   | <i>Gnaq</i>    | <i>Mbd2</i>    | <i>Ppap2a</i> | <i>Sema3a</i>  | <i>Txk</i>     |
| <i>Calcr1</i>  | <i>Cxcl2</i>  | <i>Gucy1a3</i> | <i>Mertk</i>   | <i>Ppap2b</i> | <i>Sirpa</i>   | <i>Tyrobp</i>  |
| <i>Ccl6</i>    | <i>Cybb</i>   | <i>Gucy1b3</i> | <i>Mgat5</i>   | <i>Pparg</i>  | <i>Skap1</i>   | <i>Unc5c</i>   |
| <i>Ccr5</i>    | <i>Ddx3x</i>  | <i>Hgf</i>     | <i>Mgl1</i>    | <i>Ppt2</i>   | <i>Slc1a2</i>  | <i>Vav2</i>    |
| <i>Ccr11</i>   | <i>Dll4</i>   | <i>Hipk2</i>   | <i>Mitf</i>    | <i>Prkcd</i>  | <i>Slit2</i>   | <i>Vegfc</i>   |
| <i>Ccr2</i>    | <i>Edn1</i>   | <i>Id2</i>     | <i>Mpp1</i>    | <i>Prkcq</i>  | <i>Snx27</i>   | <i>Vim</i>     |
| <i>Cd274</i>   | <i>Efnb1</i>  | <i>Il1a</i>    | <i>Msn</i>     | <i>Prkd2</i>  | <i>Sod2</i>    | <i>Vsn11</i>   |
| <i>Cd40</i>    | <i>Efnb2</i>  | <i>Il1rn</i>   | <i>Myo1f</i>   | <i>Prkx</i>   | <i>Sod3</i>    | <i>Xcr1</i>    |
| <i>Cd48</i>    | <i>Egr2</i>   | <i>Iqgap1</i>  | <i>Ncf1</i>    | <i>Ptger2</i> | <i>St6gal1</i> | <i>Zc3h12a</i> |
| <i>Cd93</i>    | <i>Epha4</i>  | <i>Iqsec1</i>  | <i>Ndst1</i>   | <i>Ptgir</i>  | <i>Tbx3</i>    |                |
| <i>Cd97</i>    | <i>Errfi1</i> | <i>Itga1</i>   | <i>Nfatc1</i>  | <i>Ptpn12</i> | <i>Tbx5</i>    |                |

**Table S4, related to Figure 4**

**Summary of the SMAD4 ChIP-Seq data**

| Description                                                                             | Act Regions | 1_Smad4::1  | 1_Smad4::1 % | 2_Input::1 | 2_Input::1 % |
|-----------------------------------------------------------------------------------------|-------------|-------------|--------------|------------|--------------|
| Total Number of Intervals in Build 37_1                                                 |             | 23725       |              | 7          |              |
| Number of Intervals Converted to Build 37_1                                             | 23725       | 23725       | 100.00%      | 7          | 100.00%      |
| Number of Intervals within -10000/+10000 bp of NCBI Genes                               | 18630       | 18630       | 78.52%       | 6          | 85.71%       |
| Number of Intervals NOT within -10000/+10000 bp of NCBI Genes                           | 5095        | 5095        | 21.48%       | 1          | 14.29%       |
| Number of NCBI Genes with Intervals within -10000/+10000 bp                             | 13103       | 13103       |              | 6          |              |
| Number of Intervals within Promoter Region (-7500/+2500 bp of NCBI Gene Start)          | 10165       | 10158       | 42.82%       | 2          | 28.57%       |
| Number of Intervals 500 bp of NCBI Tx Start                                             | 7058        | 6962        | 29.34%       | 1          | 14.29%       |
| Number of NCBI Genes with UCSC CpGs and intervals in Promoters (-7500/2500 bp of start) | 9133        | 9133        |              | 5          |              |
| Number of NCBI Genes with intervals in Promoters (-7500/2500 bp of start)               | 10717       | 10717       |              | 5          |              |
| Number of Intervals within 200 bp of UCSC CpG Islands                                   | 8214        | 8214        | 34.62%       | 5          | 71.43%       |
| Avg Interval Length                                                                     | 851.4429    | 852.2869    |              | 3405.8333  |              |
| Max Interval Length                                                                     | 8542        | 8543        |              | 8396       |              |
| Min Interval Length                                                                     | 247         | 248         |              | 897        |              |
| Avg Probe Value                                                                         |             | 2.342326016 |              | 2.0975441  |              |
| Max Probe Value                                                                         |             | 312         |              | 238        |              |
|                                                                                         |             |             |              |            |              |
| Total Probe Count                                                                       |             | 47405430    |              | 52937641   |              |

**Table S5, related to Figure 3**

341 significantly altered genes are only overlapped between the gene microarray of (CCSP<sup>iCre</sup> Pten<sup>fl/fl</sup> Smad4<sup>fl/fl</sup> vs WT) and that of (Ad-Cre-Pten<sup>fl/fl</sup> Lkb1<sup>fl/fl</sup> vs WT)

**Up-regulated genes (228 genes)**

|                 |                |                 |                 |                |                 |                  |
|-----------------|----------------|-----------------|-----------------|----------------|-----------------|------------------|
| 4833423E24Rik   | <i>Cdcp1</i>   | <i>Fscn1</i>    | <i>Kif21a</i>   | <i>Oit1</i>    | <i>Sdcbp2</i>   | <i>Tmc5</i>      |
| 9930032O22Rik   | <i>Ceacam1</i> | <i>Fut9</i>     | <i>Kirrel3</i>  | <i>Otx1</i>    | <i>Sectm1a</i>  | <i>Tmem158</i>   |
| <i>Abcc1</i>    | <i>Celsr2</i>  | <i>Fxyd3</i>    | <i>Klf5</i>     | <i>Padi1</i>   | <i>Sectm1b</i>  | <i>Tmem40</i>    |
| <i>Abcc4</i>    | <i>Chac2</i>   | <i>Fxyd4</i>    | <i>Klk11</i>    | <i>Papss1</i>  | <i>Serinc2</i>  | <i>Tmprss11a</i> |
| <i>Acpp</i>     | <i>Chl1</i>    | <i>Gabrp</i>    | <i>Krt14</i>    | <i>Pax9</i>    | <i>Serpib11</i> | <i>Tmprss4</i>   |
| <i>Adam8</i>    | <i>Cib1</i>    | <i>Gale</i>     | <i>Krt17</i>    | <i>Perp</i>    | <i>Serpib1a</i> | <i>Tnfaip8</i>   |
| <i>Adh7</i>     | <i>Ckap4</i>   | <i>Galnt12</i>  | <i>Krt5</i>     | <i>Pir</i>     | <i>Serpib1b</i> | <i>Tnnt2</i>     |
| <i>Agr2</i>     | <i>Clca2</i>   | <i>Galnt3</i>   | <i>Krt6a</i>    | <i>Pkp1</i>    | <i>Serpib2</i>  | <i>Tpm2</i>      |
| <i>Aldh18a1</i> | <i>Clca4</i>   | <i>Galnt4</i>   | <i>L1cam</i>    | <i>Pkp3</i>    | <i>Sfn</i>      | <i>Traf4</i>     |
| <i>Aldh1a3</i>  | <i>Cldn4</i>   | <i>Gcnt1</i>    | <i>Leo1</i>     | <i>Plac8</i>   | <i>Skp2</i>     | <i>Trim13</i>    |
| <i>Alox12e</i>  | <i>Col17a1</i> | <i>Glis3</i>    | <i>Lgals12</i>  | <i>Plch1</i>   | <i>Slc16a14</i> | <i>Trim15</i>    |
| <i>Alox15</i>   | <i>Defb1</i>   | <i>Gpc1</i>     | <i>Lrig3</i>    | <i>Plekhg3</i> | <i>Slc2a4</i>   | <i>Trp63</i>     |
| <i>Anxa8</i>    | <i>Dio2</i>    | <i>Gpr37l1</i>  | <i>Lrrc2</i>    | <i>Plk1</i>    | <i>Slc35a1</i>  | <i>Tshz2</i>     |
| <i>Apobec2</i>  | <i>Dmkn</i>    | <i>Gpx2</i>     | <i>Ly6d</i>     | <i>Plscr1</i>  | <i>Slc35c1</i>  | <i>Ttll10</i>    |
| <i>Aqp3</i>     | <i>Dpysl3</i>  | <i>Gramd3</i>   | <i>Ly6g6e</i>   | <i>Plxna3</i>  | <i>Slc39a11</i> | <i>Ube2f</i>     |
| <i>Aqp4</i>     | <i>Dsc2</i>    | <i>Gsta4</i>    | <i>Mall</i>     | <i>Pml</i>     | <i>Slc39a6</i>  | <i>Upk1b</i>     |
| <i>Arntl2</i>   | <i>Dsg2</i>    | <i>Gsto1</i>    | <i>Marveld3</i> | <i>Pof1b</i>   | <i>Slc44a4</i>  | <i>Upk3a</i>     |
| <i>Atp10b</i>   | <i>Dsp</i>     | <i>H28</i>      | <i>Matn2</i>    | <i>Ppap2c</i>  | <i>Slc45a3</i>  | <i>Vangl1</i>    |
| <i>Atp2c2</i>   | <i>Efna5</i>   | <i>Has2</i>     | <i>Melk</i>     | <i>Ppif</i>    | <i>Slc5a9</i>   | <i>Vtcn1</i>     |
| <i>B3galt2</i>  | <i>Ehf</i>     | <i>Hist1h4j</i> | <i>Mfsd4</i>    | <i>Ppp2r1b</i> | <i>Slc9a3r1</i> | <i>Zbp1</i>      |
| <i>Bace2</i>    | <i>Elf3</i>    | <i>Hmgn3</i>    | <i>Mgat3</i>    | <i>Prdm1</i>   | <i>Slco4a1</i>  | <i>Zdhhc13</i>   |
| <i>Bcl11a</i>   | <i>Endod1</i>  | <i>Hsh2d</i>    | <i>Mst1</i>     | <i>Prss22</i>  | <i>Sorbs2</i>   | <i>Zdhhc7</i>    |
| <i>Brms1</i>    | <i>Enpp3</i>   | <i>Ifi35</i>    | <i>Myl7</i>     | <i>Psat1</i>   | <i>Sostdc1</i>  | <i>Zfp53</i>     |
| <i>Bspry</i>    | <i>Entpd7</i>  | <i>Ifi44</i>    | <i>Nans</i>     | <i>Ptges</i>   | <i>Sox2</i>     | <i>Zfp750</i>    |
| <i>Btbd11</i>   | <i>Epsti1</i>  | <i>Ifit1</i>    | <i>Net1</i>     | <i>Ptn</i>     | <i>Sox21</i>    |                  |
| <i>C79407</i>   | <i>Erbp2</i>   | <i>Igfbp3</i>   | <i>Nfe2l3</i>   | <i>Ptpn13</i>  | <i>Sprr1a</i>   |                  |

**Down-regulated genes (113 genes)**

|                |                |               |                 |               |                      |                      |
|----------------|----------------|---------------|-----------------|---------------|----------------------|----------------------|
| <i>Zmynd15</i> | <i>Slc7a2</i>  | <i>Ptgs1</i>  | <i>Man1c1</i>   | <i>Gtf2b</i>  | <i>Cys1</i>          | <i>Arb1</i>          |
| <i>Vim</i>     | <i>Slc43a3</i> | <i>Prdm2</i>  | <i>Lonrf3</i>   | <i>Gprin3</i> | <i>Ctsz</i>          | <i>Arhgef6</i>       |
| <i>Vav2</i>    | <i>Slc36a2</i> | <i>Pqlc3</i>  | <i>Lhfp12</i>   | <i>Gpm6b</i>  | <i>Ctps2</i>         | <i>Arhgap6</i>       |
| <i>Ugcg</i>    | <i>Slc29a1</i> | <i>Phf2</i>   | <i>Lepr</i>     | <i>Gna13</i>  | <i>Cnnm3</i>         | <i>Anxa4</i>         |
| <i>Trpm6</i>   | <i>Sh3tc1</i>  | <i>Pecam1</i> | <i>Lcp1</i>     | <i>Frm4a</i>  | <i>Cideb</i>         | <i>AI504432</i>      |
| <i>Trpc1</i>   | <i>Rora</i>    | <i>Nr3c1</i>  | <i>Lass4</i>    | <i>Fnip1</i>  | <i>Chst12</i>        | <i>Adamts8</i>       |
| <i>Tns1</i>    | <i>Rnf180</i>  | <i>Npr1</i>   | <i>Itpkb</i>    | <i>Fhod1</i>  | <i>Chi3l1</i>        | <i>Acp2</i>          |
| <i>Tbx5</i>    | <i>Rnf146</i>  | <i>Npnt</i>   | <i>Itih4</i>    | <i>Fgf7</i>   | <i>Cds2</i>          | <i>Ace</i>           |
| <i>Tbc1d24</i> | <i>Rgl1</i>    | <i>Nox4</i>   | <i>Itga1</i>    | <i>Fcer2a</i> | <i>Cdc14b</i>        | <i>Abcc5</i>         |
| <i>Tacc1</i>   | <i>Rbpms</i>   | <i>Nfic</i>   | <i>lqsec1</i>   | <i>Errfi1</i> | <i>Cd97</i>          | <i>9030425E11Rik</i> |
| <i>Synj1</i>   | <i>Rbms3</i>   | <i>Nfatc1</i> | <i>lqgap1</i>   | <i>Epn2</i>   | <i>Cd302</i>         | <i>4631416L12Rik</i> |
| <i>Stard4</i>  | <i>Rbms2</i>   | <i>Nebi</i>   | <i>Hsd17b11</i> | <i>Epb4.9</i> | <i>Casc4</i>         |                      |
| <i>St6gal1</i> | <i>Rassf8</i>  | <i>Msn</i>    | <i>Hoxa5</i>    | <i>Eif5a2</i> | <i>C230081A13Rik</i> |                      |
| <i>Specc1l</i> | <i>Rassf4</i>  | <i>Mospd2</i> | <i>Hnrp1l</i>   | <i>Egr2</i>   | <i>C030046E11Rik</i> |                      |
| <i>Spata6</i>  | <i>Rapgef3</i> | <i>Mitf</i>   | <i>Hipk2</i>    | <i>Dtna</i>   | <i>Braf</i>          |                      |
| <i>Snx27</i>   | <i>Rab12</i>   | <i>Mapre2</i> | <i>H2-DMb2</i>  | <i>Dst</i>    | <i>Atxn1</i>         |                      |
| <i>Smarca2</i> | <i>Ptpn12</i>  | <i>Map4k3</i> | <i>Gucy1a3</i>  | <i>Dhdh</i>   | <i>Asah1</i>         |                      |

**Table S6, The sequence for the gene primers of qPCR**

Mouse Primers (5'-3'):

|                |                |                         |
|----------------|----------------|-------------------------|
| <i>Cxadr</i>   | Forward primer | TCTTCTGCTGTCACAGGAAACG  |
| <i>Cxadr</i>   | Reverse primer | CGGTCTTGTAAGCGTACTTGAA  |
| <i>Gclc</i>    | Forward primer | GGGGTGACGAGGTGGAGTA     |
| <i>Gclc</i>    | Reverse primer | GTTGGGGTTTGTCTCTCCC     |
| <i>Ncam1</i>   | Forward primer | ACCACCGTCACCACTAACTCT   |
| <i>Ncam1</i>   | Reverse primer | TGGGGCAATACTGGAGGTCA    |
| <i>Asns</i>    | Forward primer | GCAGTGTCTGAGTGCGATGAA   |
| <i>Asns</i>    | Reverse primer | TCTTATCGGCTGCATTCCAAAC  |
| <i>Ceacam1</i> | Forward primer | ATTTACGGGGCAAGCATACA    |
| <i>Ceacam1</i> | Reverse primer | GTCACCCTCCACGGGATTG     |
| <i>Bcl2l1</i>  | Forward primer | GACAAGGAGATGCAGGTATTGG  |
| <i>Bcl2l1</i>  | Reverse primer | TCCCGTAGAGATCCACAAAAGT  |
| <i>Flt1</i>    | Forward primer | TGGCTCTACGACCTTAGACTG   |
| <i>Flt1</i>    | Reverse primer | CAGGTTTGACTTGTCTGAGGT   |
| <i>Timp3</i>   | Forward primer | CTTCTGCAACTCCGACATCGT   |
| <i>Timp3</i>   | Reverse primer | GGGGCATCTTACTGAAGCCTC   |
| <i>Agr2</i>    | Forward primer | GGAGCCAAAAGGACCCAAAG    |
| <i>Agr2</i>    | Reverse primer | CTGTTGCTTGTCTTGGATCTGT  |
| <i>Itgb4</i>   | Forward primer | GCAGACGAAGTTCCGACAG     |
| <i>Itgb4</i>   | Reverse primer | GGCCACCTTCAGTTCATGGA    |
| <i>Cldn4</i>   | Forward primer | GTCCTGGGAATCTCCTTGGC    |
| <i>Cldn4</i>   | Reverse primer | TCTGTGCCGTGACGATGTTG    |
| <i>Muc4</i>    | Forward primer | CCTCCTCTTGCTACCTGATGC   |
| <i>Muc4</i>    | Reverse primer | GGAACCTGGAGTATCCCTTGTTG |
| <i>Erb2</i>    | Forward primer | GAGACAGAGCTAAGGAAGCTGA  |
| <i>Erb2</i>    | Reverse primer | ACGGGGATTTTCAGTTCTCC    |
| <i>Id2</i>     | Forward primer | ATGAAAGCCTTCAGTCCGGTG   |
| <i>Id2</i>     | Reverse primer | AGCAGACTCATCGGGTCTGT    |
| <i>Efnb2</i>   | Forward primer | ATTATTTGCCCAAAGTGGACTC  |
| <i>Efnb2</i>   | Reverse primer | GCAGCGGGGTATTCTCCTTC    |
| <i>Ctsd</i>    | Forward primer | GCTTCCGGTCTTTGACAACCT   |
| <i>Ctsd</i>    | Reverse primer | CACCAAGCATTAGTTCTCCTCC  |
| <i>Expi</i>    | Forward primer | CCACAGTCTTTGTTCTGGTAGC  |
| <i>Expi</i>    | Reverse primer | CACAAGTTCCAAAAGTGCCTG   |
| <i>Krt15</i>   | Forward primer | AGCTATTGCAGAGAAAACCGT   |
| <i>Krt15</i>   | Reverse primer | GGTCCGTCTCAGGTCTGTG     |
| <i>Reg3g</i>   | Forward primer | ATGCTTCCCCGTATAACCATCA  |
| <i>Reg3g</i>   | Reverse primer | GGCCATATCTGCATCATACCAG  |
| <i>Fxyd3</i>   | Forward primer | ATTTGTGCAGGGATTCTCTGTG  |
| <i>Fxyd3</i>   | Reverse primer | GCCTGGTGTGATGAGAGGTG    |
| <i>Cldn2</i>   | Forward primer | CAACTGGTGGGCTACATCCTA   |
| <i>Cldn2</i>   | Reverse primer | CCCTTGAAAAGCCAACCG      |
| <i>Steap1</i>  | Forward primer | GGTCGCCATTACCCTTGG      |



|               |                |                         |
|---------------|----------------|-------------------------|
| <i>Steap1</i> | Reverse primer | GGTATGAGAGACTGTAAACAGCG |
| <i>Elf3</i>   | Forward primer | GCTGCCACCTGTGAGATCAG    |
| <i>Elf3</i>   | Reverse primer | GTGCCAAAGGTAGTCGGAGG    |
| <i>Errfi1</i> | Forward primer | TGGCCTACAATCTGAACTCCC   |
| <i>Errfi1</i> | Reverse primer | GACCACACTCTGCAAAGAAGT   |

Human Primers (5'-3'):

|             |                |                      |
|-------------|----------------|----------------------|
| <i>Elf3</i> | Forward primer | CAACTATGGGGCCAAAAGAA |
| <i>Elf3</i> | Reverse primer | TTCCGACTCTGGAGAACCTC |

**Table S7, The sequence for the gene primers of Chip-qPCR**

Mouse Primers (5'-3'):

|               |                |                      |
|---------------|----------------|----------------------|
| <i>Elf3</i>   | Forward primer | GGTTGCTGAAGCGGTAGAGA |
| <i>Elf3</i>   | Reverse primer | GGGTAATCAGGAGCAGACCA |
| <i>Errfi1</i> | Forward primer | ATCCAAGTGCATCTCAGCGT |
| <i>Errfi1</i> | Reverse primer | TCTCCTGAGGGGACGTTTCT |

## SUPPLEMENTAL EXPERIMENTAL PROCEDURES

### Generation of *Pten*<sup>d/d</sup>, *Smad4*<sup>d/d</sup>, *Pten*<sup>d/d</sup> *Smad4*<sup>d/d</sup>, *Errfi*<sup>d/d</sup> and *Errfi*<sup>d/d</sup> *Pten*<sup>d/d</sup> mice

All animal experiments were performed in accordance with an IACUC approved protocol (Baylor College of Medicine, Houston, TX). Generation of *CCSP*<sup>iCre</sup> mice were carried out as previously described (Li et al., 2008) with some modifications. An *iCre-SV40 PolyA* fragment was amplified from the *Cyp171*Cre plasmid by PCR and subcloned immediately upstream to a *Frt*-flanked phosphoglycerol kinase neomycin-resistance cassette (*PGK-Neo*). The *iCre-SV40 PolyA-PGK-Neo* fragment was again subcloned into a *pGEM-4Z* plasmid harboring a 5.3-kb mouse *CCSP* genomic sequence (Margraf et al., 1993) and the targeting plasmid was linearized and transfected into R1 ES cells by electroporation. Genomic DNA was isolated from Neomycin-resistant clones and digested with *Nde I* and *Xho I* and were screened by Southern blot analysis using a 5' external probe. Selected targeted clones were microinjected into blastocysts from C57BL/6 mice. Chimeras were bred to C57BL/6 mice and germ line transmission of the *iCre* gene to F1 offspring was validated with PCR genotyping. The *CCSP*<sup>iCre</sup> mice were crossed with *Pten*<sup>fl/fl</sup> (Lesche et al., 2002), *Smad4*<sup>fl/fl</sup> (Chu et al., 2004, Biondi et al., 2007) and *Errfi1*<sup>fl/fl</sup> (Jin et al., 2007) mice to generate single *Pten*<sup>d/d</sup>, *Smad4*<sup>d/d</sup>, *Errfi*<sup>d/d</sup>, *Smad4*<sup>d/d</sup> *Pten*<sup>d/d</sup> and *Errfi*<sup>d/d</sup> *Pten*<sup>d/d</sup> transgenic mice.

### Histopathology, Immunohistochemistry, Immunofluorescence staining and Western blotting

Mice lungs were fixed in 4% paraformaldehyde and paraffin-embedded according to standard protocols. H&E and immunohistochemical analysis of 5 µm lung sections were performed. Sections underwent dewaxing followed by antigen retrieval (Vector, H3300)

and peroxide quenching with 3% H<sub>2</sub>O<sub>2</sub> in methanol for 15 minutes and blocked with 10% normal goat serum or MOM blocking reagents. Subsequently, the slides were incubated with primary antibodies at 4°C overnight followed with secondary antibodies at RT for 30 min. The slides were then developed using the Vectastain ABC kit and DAB reagents (Vector Laboratory). Apoptosis analysis was performed with the *In Situ* Cell Death Detection Kit (Roche, 11684795910) following the manufacture instructions. The TSA kit was used for developing slides where immunofluorescence was utilized. All quantitative data were obtained from three to five mice per group. Statistical analysis was performed using one-way ANOVA or Student T-test (p value is \*p<0.05, \*\*p<0.01, and \*\*\*p<0.001). Primary antibodies that were used are listed in the table.

#### Antibodies for immunostaining

| <b>Antigen</b> | <b>Supplier</b> | <b>Cat.#</b> |
|----------------|-----------------|--------------|
| Pten           | Cell Signaling  | CST9559      |
| Smad4          | Santa Cruz      | sc-7966      |
| Smad4          | Cell Signaling  | CST9515      |
| CCSP           | DeMayo Lab      | None         |
| SP-C           | Seven Hills     | WRAP-SP-C    |
| SPP1           | Santa Cruz      | sc-21742     |
| EpCAM          | Proteintech     | 21050-1-AP   |
| TTF-1          | Dako            | M3575        |
| TTF-1          | Santa Cruz      | sc-13040     |
| p63            | Santa Cruz      | sc-8431      |
| SOX2           | Millipore       | AB5603       |
| KRT5           | Abcam           | ab52635      |
| KRT7           | Santa Cruz      | sc-23876     |
| KRT14          | Covance         | Sig-3476     |
| Ki67           | Abcam           | ab15580      |
| ERBB2          | Santa Cruz      | sc-284       |
| p-ERBB2        | Santa Cruz      | sc-293110    |
| AKT            | Cell Signaling  | CST4691      |
| p-AKT          | Cell Signaling  | CST4060      |
| ELF3           | Sigma           | HPA003319    |

## Antibodies for Western Blot

| <b>Antigen</b>    | <b>Supplier</b> | <b>Cat.#</b> |
|-------------------|-----------------|--------------|
| Pten              | Cell Signaling  | CST9559      |
| p-AKT             | Cell Signaling  | CST4060      |
| AKT               | Cell Signaling  | CST4691      |
| SMAD4             | Cell Signaling  | CST9515      |
| p-ERBB2           | Santa Cruz      | SC-293110    |
| ERBB2             | Santa Cruz      | SC-284       |
| ERRFI1            | DeMayo Lab      | None         |
| ELF3              | R&D             | AF5787       |
| p-SMAD2           | Cell Signaling  | CST3108      |
| SMAD2             | Cell Signaling  | CST5339      |
| p-SMAD3           | Cell Signaling  | CST9520      |
| SMAD3             | Cell Signaling  | CST9523      |
| p-SMAD1/5         | Cell Signaling  | CST9516      |
| SMAD1             | Cell Signaling  | CST6944      |
| SMAD5             | Cell Signaling  | CST9517      |
| p-TGF $\beta$ RII | Santa Cruz      | SC-17005     |
| TGF $\beta$ RII   | Santa Cruz      | SC-400       |
| SMAD6             | Cell Signaling  | CST9519      |
| p-EGFR            | Cell Signaling  | CST3777      |
| EGFR              | Santa Cruz      | SC-03        |
| p-ERBB3           | Cell Signaling  | CST4791      |
| ERBB3             | Santa Cruz      | SC-285       |
| p-ERBB4           | Santa Cruz      | SC-33040     |
| ERBB4             | Santa Cruz      | SC-283       |
| p-mTOR            | Cell Signaling  | CST2971      |
| mTOR              | Cell Signaling  | CST2983      |
| p-p65             | Cell Signaling  | CST3033      |
| p65               | Cell Signaling  | CST8242      |
| p-ERK1/2          | Cell Signaling  | CST4370      |
| ERK1/2            | Cell Signaling  | CST4695      |
| p-p38             | Cell Signaling  | CST4511      |
| p38               | Cell Signaling  | CST8690      |
| p-JNK1/2          | Cell Signaling  | CST4668      |
| JNK1/2            | Santa Cruz      | SC-572       |

## Cell derivation and culture

Beas-2B (ATCC<sup>®</sup> CRL-9609<sup>™</sup>) and NL20 (ATCC<sup>®</sup> CRL-2503<sup>™</sup>) cells were purchased from ATCC and cultured by following the ATCC culture condition. The culture medium for Beas-2B cells contains the free medium (CC-3171, LONZA), the growth factor (CC-4175, LONZA), Penicillin (100I.U./mL) and Streptomycin (100µg/mL) (ATCC<sup>®</sup> 30-2300<sup>™</sup>). The culture medium for NL20 cells was consist of F-12K medium (21127-022, Life Technologies), 4% FBS (16000-044, Life Technologies) and Pen./Strep.. 293T cells were purchased from Tissue culture core in Baylor College of Medicine and was cultured with DMEM medium (11965-092, Life Technologies), 10% FBS (16000-044, Life Technologies) and Pen./Strep..

## Senescence experiment

Frozen lung sections were prepared from 10-month-old mice and treated using the standard protocol of the Senescence Detection Kit (Abcam, Cat. Ab65351).

## Real Time Quantitative PCR

Total RNAs were isolated from mouse lungs with TRIzol reagent (Invitrogen) and reversely transcribed into cDNA with the M-MLV kit (Invitrogen). The mRNA expression levels of human and mouse were determined by quantitative Real-time PCR using SYBR Green and Taqman probes (Applied Biosystems). Statistical analysis was performed using one-way ANOVA and Student T- test (p value is \*p<0.05, \*\*p<0.01, and \*\*\*p<0.001). Mouse lung cancer Microarray: Lung tumors macro-dissected from 12 months old *Pten*<sup>d/d</sup>*Smad4*<sup>d/d</sup> mice, and control lung tissues harvested from 12 month-old

wild type mice were used for the microarray analysis of late stage (3 mice per group). Lungs from 7 month-old wild type, *Pten*<sup>d/d</sup> and *Pten*<sup>d/d</sup>*Smad4*<sup>d/d</sup> mice were utilized for microarray analysis of early stage (6 mice per group). Briefly lung tissues were stored at -80°C and total RNA was extracted using the TRIzol method (TRIzol reagent; Invitrogen, Carlsbad, CA) followed by purification using an RNeasy column (Qiagen, Valencia, CA). RNA quality was assessed by using the Agilent Model 2100 Bioanalyzer (Agilent Technologies, Palo Alto, CA). Ten micrograms of total RNA was processed for the microarray by using the Affymetrix GeneChip one-cycle target labeling kit (Affymetrix, Santa Clara, CA) according to the manufacturer's recommended protocols. After reverse transcription followed by *in vitro* transcription and biotin labeling, the labeled cRNA was hybridized to Affymetrix mouse genome 430 2.0 arrays (Affymetrix, Santa Clara, CA, USA). Data analysis was performed according to standard protocols including scanning of hybridization images and quantification was done using Microarray suite. A DNA-Chip Analyzer dChip (version 1.3) was utilized on log-transformed data for quantile normalization and a PM-MM model was used to determine expression. A fold change of 1.4 and a p-value of <0.01 (two-sided t-test) were used as cut-offs for differential expression. The murine gene signature that was obtained from the microarray expression analysis was then compared to profiles from the human lung cancer expression datasets, utilizing previously described methods (Gibbons et al., 2009). Taqman probes & primers from Life Technologies were used to detect human *PTEN* and *SMAD4* (Life Technologies). The list of primers for SYBR® Green is shown in **(Table S5)**. All Q-PCR experiments for the validation of the Microarray were done with the same number of mice. All Q-PCR experiments for the human cells were repeated three times in the biological way. Ingenuity Systems Pathway Analysis (IPA) software (<http://www.ingenuity.com>) was used for gene functional annotations.

## **Human lung cancer samples and Tissue Microarray**

All human lung tissues were obtained from the Lung Cancer Specialized Program of Research Excellence (SPORE) Tissue Bank at the MD Anderson Cancer Center and an IRB was approved for expression studies from this Tissue Bank. For each tissue sample, the percentage of malignant tissue was calculated and the cellular composition of specimens was determined by histological examination (I.I.W.) following Hematoxylin-Eosin (H&E) staining. Specimens resected from NSCLC patients with stages I to IV disease according to the revised International System for Staging Lung Cancer were used for making tissue microarray (TMA) (Mountain, 1997). The TMAs were prepared with a manual tissue arrayer (Advanced Tissue Arrayer ATA100, Chemicon International) using 1-mm-diameter cores in triplicates. Patients who had follow-up length more than 3 months were valid to access into analysis of prognostic overall and recurrence-free survival prediction assay. Patients who had smoked at least 100 cigarettes in their lifetime were defined as smokers, and smokers who quit smoking at least 12 months before lung cancer diagnosis were defined as former smokers. Tissue Micro Array: Immunohistochemistry (IHC) staining was performed as previously described (Tang et al., 2011). Tissue section slides were baked at 56°C overnight, then deparaffinized in xylene and rehydrated through a degraded series of ethanol concentrations. Antigen retrieval was carried out using a decloaker (pH9, 121°C for 30 second and then 90°C for 10 minutes). Intrinsic peroxidase activity was blocked by 3% hydrogen peroxide for 10 minutes and intrinsic avidin and biotin was blocked by incubating sections with avidin and biotin for 10 minutes, respectively then washed in TBS, nonspecific antibody binding was blocked by incubating with 5% goat serum (Sigma) solution at room temperature for 60 minutes. Slides were then incubated with primary antibodies against SMAD4 (Mouse

monoclonal, clone 138G6, Santa Cruz, CA, dilution 1:300) at RT for 60 min. After 3 washes in Tris-buffered saline with Tween-20 (TBST) for 5 min each, the slides were incubated with Vector Elite ABC complex at RT for 30 min. Following additional 3 washes in TBST, the slides were incubated with Dako chromogen substrate for 5 min and counterstained with hemotoxylin for 1 min. Two pathologists (X.T. and I.W.) examined both the intensity and extent of immunostaining by light microscopy using a  $\times 20$  magnification objective. Quantification schema was developed as SMAD4 is expressed both in the nucleus and cytoplasm. Cytoplasmic and nuclear expressions were quantified using a 4-value intensity score (0, none; 1+, weak; 2+, moderate; and 3+, strong) and the reactivity extension (0–100) (**Figure S1F**). A final expression score (0–300) was obtained by multiplying the intensity and reactivity extension. This expression score was utilized to stratify patients into low SMAD4 (<100) and high SMAD4 (>100) groups and Kaplan-Meier estimates were performed to evaluate differences in overall survival and recurrence-free survival between the two groups. Quantification schema was developed as SMAD4 is expressed both in the nucleus and cytoplasm. Cytoplasmic and nuclear expressions were quantified using a 4-value intensity score (0, none; 1+, weak; 2+, moderate; and 3+, strong) and the reactivity extension (0–100) (**Figure S1F**). A final expression score (0–300) was obtained by multiplying the intensity and reactivity extension. This expression score was utilized to stratify patients into low SMAD4 (<100) and high SMAD4 (>100) groups and Kaplan-Meier estimates were performed to evaluate differences in overall survival and recurrence-free survival between the two groups.

### **siRNA and shRNA experiments**

siRNA experiments: ON-TARGET plus siRNAs SMARTpools (Thermo) were used, consisting of four mixed siRNAs targeting each gene (*PTEN*, *SMAD4*, *ELF3*). As a



control, a nontargeting siRNA pool was used. Final concentration for each siRNA was 40nM. The transfection reagent Lipofectamine® RNAiMAX from Life Technologies (Cat. 13778150) was utilized and all processes followed the standard protocol of Lipofectamine® RNAiMAX. shRNA experiments: All the pGIPZ lentivirus shRNA plamids for *PTEN* (Cat. RHS4430-99140716 and RHS4430-98902220), *SMAD4* (Cat. RHS4430-98485365 and RHS4430-98893393) and nontargeting control (Cat. RHS4346\_00000000) were purchased from the C-BASS Core at Baylor College of Medicine. Fifteen micrograms of the pGIPZ vector together with 7.5 µg of each packaging vector (pMD2.G and psPAX2) were cotransfected into 293T cells. Supernatant containing lentivirus particles was harvested 48h after transfection, passed through a 0.45-µm membrane filter, and directly used to infect cells in the presence of 6 µg/mL polybrene. After 24 h, the infected cells were maintained in the medium with 2 µg/mL puromycin for 2 weeks before knockdown assessment.

### **CHIP-Seq and Chip-qPCR**

CHIP-Seq: a. Chromatin Immunoprecipitation: Mouse lung tissues were submersed in PBS + 1% formaldehyde, cut into small (~1 mm<sup>3</sup>) pieces with a razor blade and incubated at RT for 15 min. Fixation was stopped by the addition of 0.125 M glycine (final). The tissue pieces were then treated with a Tissue Tearer and finally spun down and washed 2x in PBS. Chromatins were isolated from the sample by the addition of lysis buffer followed by disruption with a Dounce homogenizer. Lysates were sonicated with a microtip in order to shear the DNA to an average length of 300-500 bp. Lysates were cleared by centrifugation and stored at -80 C. Genomic DNA (Input) was prepared by treating aliquots of chromatin with RNase, proteinase K and heat for de-crosslinking, followed by phenol/chloroform extraction and ethanol precipitation. Purified DNA was

quantified on a NanoDrop spectrophotometer. Extrapolation to the original chromatin volume allowed quantitation of the total chromatin yield. For each CHIP reaction, 30 ug of chromatin was precleared with protein G agarose beads (Invitrogen). CHIP reactions were set up using precleared chromatin and antibody SMAD4 (R&D Systems, cat. AF2097, Lot# KUH0311081) and incubated overnight at 4°C. Protein G agarose beads were added and incubation at 4°C was continued for another 3 h. Immune complexes were washed, eluted from the beads with SDS buffer, and subjected to RNase treatment and proteinase K treatment. Crosslinks were reversed by incubation overnight at 65°C, and CHIP DNA was purified by phenol-chloroform extraction and ethanol precipitation. Quality of CHIP enrichment was assayed by qPCR using primers against candidate SMAD4 binding sites. qPCR reactions were carried out in triplicate using SYBR Green Supermix (Applied Biosystems). The resulting signals were normalized for primer efficiency by carrying out qPCR for each primer pair using input DNA. b. CHIP Sequencing (Illumina): CHIP and Input DNAs were prepared for amplification by converting overhangs into phosphorylated blunt ends and adding an adenine to the 3'-ends. Illumina genomic adapters were ligated and the samples were size-fractionated (200-250 bp) on a 2% agarose gel. After a final PCR amplification step (18 cycles), the resulting DNA libraries were quantified and sequenced on HiSeq 2000. Sequences (36 nt reads, single end) were aligned to the mouse genome (mm9) using the BWA algorithm. Aligns were extended in silico at their 3'-ends to a length of 150 bp, which is the average genomic fragment length in the size-selected library, and assigned to 32-nt bins along the genome. The resulting histograms (genomic "signal maps") were stored in BAR and bigWig files. Peak locations were determined using the MACS algorithm (v1.3.7.1) with a cutoff of  $pvalue = 1e-10$ . Signal maps and peak locations were used as input data to Active Motifs proprietary analysis program, which creates excel tables containing detailed information on sample comparison, peak metrics, peak locations and

gene annotations. Chip-qPCR: ChIP was performed with the SimpleChIP Enzymatic Chromatin IP Kit (Cell Signaling Technology, 9005). The lysate was prepared from 7-month old *Pten*<sup>d/d</sup> mouse lung (N=3) following the standard protocol. The lysates were sheared by sonication to a size range of 150–900 bp using VirTis Virsonic 100 Ultrasonic Homogenizer. An aliquot of sheared chromatin to be used as input DNA was treated with RNase A and proteinase K, and cross-linking was reversed by heat. The purified input DNA was quantified on a Biotek Microplate Spectrophotometer. Chromatin/protein complexes (10 µg) were precleared with normal rabbit IgG (sc-2017, Santa Cruz Biotechnology, Inc.). ChIP was performed using an antibody against SMAD4 (R&D, AF2097). Following immunoprecipitation, crosslinking was reversed as described above. Purified DNA was used for real-time qPCR. The primers were designed to amplify SMAD4 binding regions identified by ChIP-Seq (**Table S6**). Real-time qPCR was carried out in duplicate using SYBR Green Supermix (Applied Biosystems). Immunoprecipitation with normal rabbit IgG was performed as a negative control. Untra Primers were designed for a region of the mouse genome devoid of any known genes to serve as a negative qPCR primer set (Active Motif). The resulting signals were normalized to input DNA. Sequence conservation, cis-regulatory Element Annotation System (CEAS), and motif enrichment were performed using the Cistrome Analysis Pipeline software (<http://cistrome.org/ap/>) under default settings.

### **Transwell migration assay, invasion assay and MTS assay**

Standard 24-well Boyden control and invasion chambers (BD Biosciences) were used to assess cell migration and invasion following the manufacturer's suggestions. Briefly, cells were trypsinized, rinsed twice with PBS, resuspended in serum-free media, and seeded at  $1 \times 10^5$  cells per well for BEAS-2B and NL20 cells per well. Chambers in

triplicate were placed in growth media as a chemo-attractant and an equal number of cells were seeded in cell culture plates in triplicate as input controls. Following 18h incubation for the migration assay and 22 h incubation for the invasion assay, chambers were fixed in 10% formalin, stained with crystal violet for manual counting. Data were normalized to input cells to control for differences in cell number (loading control). Meanwhile, 5000 cells were seeded into each well in flat bottomed 96-well plates and triplicate wells are placed for each sample. After 6 hours (Day 0) and 5 days (Day 5), CellTiter 96® Aqueous One Solution Reagent (Promega, G3580) was added to each well according to the manufacturer's instructions. After 1 h in culture the cell viability was determined by measuring the absorbance at 490nm.

### **Inhibitors treatment**

Inhibitors: GDC-0941(LC Laboratories, G-9252); Lapatinib (LC Laboratories, L-4899); Herceptin (BOC Sciences, 180288-69-1); DMSO was used to dissolve these inhibitors and as a control in the experiment. Treatment on BEAS-2B cells: These inhibitors would be added into the growth medium outside the invasion chamber during the whole experiment. The other processes were the same as the invasion chamber experiment as described above. The final concentration of GDC-0941 and Lapatinib was 1µM and that of Herceptin was 10µg/ml. Treatment on mice: 9 9-month-old wild type mice were used for the control. 14 9-month-old *Pten<sup>d/d</sup>Smad4<sup>d/d</sup>* mice were randomly separated into two groups. Then one group (7 mice) was used for DMSO treatment and the other group (7 mice) was used for inhibitors treatment. These inhibitors were fed to the mice by oral gavage twice daily. The final concentration of GDC-0941 was 17 mg/kg each time and that of Lapatinib was 34 mg/kg each time.

## Human lung tumor expression datasets

The gene expression array dataset GSE11969 (Takeuchi et al., 2006) was probed using the mouse lung cancer gene signature, using previously described approaches (Minami et al., 2007).

To further understand the expression of SMAD4 in human lung cancer patients, the TCGA 2 lung cancer data was analyzed utilizing *OncoPrint*<sup>™</sup>. In *OncoPrint*<sup>™</sup>, circular binary segmentation is used to find regions or segments of a chromosome with equal copy number. All genes within that region of the chromosome are then assigned the average of the probe measurements in that segment (Rhodes et al., 2007). These gene measurements can then be reviewed for amplifications (values > 0 on a log<sub>2</sub> scale) and deletions (values < 0 on a log<sub>2</sub> scale). *OncoPrint*<sup>™</sup> was used for analysis and visualization of the log median copy number units of *SMAD4* (reporter 18-046837993, NM\_005359) in normal samples and samples of lung adenocarcinoma and squamous cell lung cancer. *OncoPrint*<sup>™</sup> was also utilized to compare the log median copy number units of *SMAD4* in early and advanced stages of lung adenocarcinoma and squamous cell lung cancer. ([www.oncoprint.com](http://www.oncoprint.com), May 2012, Compendia Bioscience, Ann Arbor, MI).

RNA sequencing data of Lung Squamous Cell Carcinoma (LUSC) and Lung Adenocarcinoma (LUAD) were obtained through TCGA pan-cancer synapse (<https://www.synapse.org/#!Synapse:syn300013>). The normalized RNA sequencing level 3 data were available in the dataset. In our analysis, the RPKM value of individual genes was subjected to logarithm (log<sub>e</sub>). When analyzing the RNA expression difference between two groups, log (RPKM) values were used, and two-tailed t test was utilized to

assess the statistical significance. When identifying the RNA expression correlation between two individual genes, log (RPKM) values were used, and Pearson's correlation analysis was employed to determine the correlation coefficient (R) and statistical significance. When identifying the RNA expression correlation between two groups of genes, relative values were used. The relative value of one gene in each sample would be dividing the log (RPKM) value of this gene over mean of the log (RPKM) values of this gene across all samples. If multiple genes were in the group, the relative value of the group would be the multiplication of the relative values of all genes in the group. Then, Pearson's correlation analysis was further used to determine the correlation coefficient (R) and statistical significance. In addition, to classify the patients into two groups based on the expression of specific gene or gene set, the relative expression values were used, a patient was classified into the high expression group if the relative expression value of the target gene or gene set was higher than the mean value, and *vice versa*. The clinical data of Lung Squamous Cell Carcinoma (LUSC) patients were also obtained through TCGA pan-cancer synapse. To investigate the clinical relevance of a specific gene, patients were divided into two groups based on the RNA expression of the gene, and then the vital status and survival length recorded in clinics were incorporated to perform the survival analysis, log-rank test was utilized in determining the difference of survival between two groups of patients.

## REFERENCES

- BIONDI, C. A., DAS, D., HOWELL, M., ISLAM, A., BIKOFF, E. K., HILL, C. S. & ROBERTSON, E. J. 2007. Mice develop normally in the absence of Smad4 nucleocytoplasmic shuttling. *Biochem J*, 404, 235-45.
- CHU, G. C., DUNN, N. R., ANDERSON, D. C., OXBURGH, L. & ROBERTSON, E. J. 2004. Differential requirements for Smad4 in TGFbeta-dependent patterning of the early mouse embryo. *Development*, 131, 3501-12.

- GIBBONS, D. L., LIN, W., CREIGHTON, C. J., ZHENG, S., BEREL, D., YANG, Y., RASO, M. G., LIU, D. D., WISTUBA, II, LOZANO, G. & KURIE, J. M. 2009. Expression signatures of metastatic capacity in a genetic mouse model of lung adenocarcinoma. *PLoS One*, 4, e5401.
- JIN, N., GILBERT, J. L., BROADDUS, R. R., DEMAYO, F. J. & JEONG, J. W. 2007. Generation of a Mig-6 conditional null allele. *Genesis*, 45, 716-21.
- LESCHE, R., GROSZER, M., GAO, J., WANG, Y., MESSING, A., SUN, H., LIU, X. & WU, H. 2002. Cre/loxP-mediated inactivation of the murine Pten tumor suppressor gene. *Genesis*, 32, 148-9.
- LI, H., CHO, S. N., EVANS, C. M., DICKEY, B. F., JEONG, J. W. & DEMAYO, F. J. 2008. Cre-mediated recombination in mouse Clara cells. *Genesis*, 46, 300-7.
- MARGRAF, L. R., FINEGOLD, M. J., STANLEY, L. A., MAJOR, A., HAWKINS, H. K. & DEMAYO, F. J. 1993. Cloning and tissue-specific expression of the cDNA for the mouse Clara cell 10 kD protein: comparison of endogenous expression to rabbit uteroglobin promoter-driven transgene expression. *Am J Respir Cell Mol Biol*, 9, 231-8.
- MINAMI, Y., SHIMAMURA, T., SHAH, K., LAFRAMBOISE, T., GLATT, K. A., LINIKER, E., BORGMAN, C. L., HARINGSMA, H. J., FENG, W., WEIR, B. A., LOWELL, A. M., LEE, J. C., WOLF, J., SHAPIRO, G. I., WONG, K. K., MEYERSON, M. & THOMAS, R. K. 2007. The major lung cancer-derived mutants of ERBB2 are oncogenic and are associated with sensitivity to the irreversible EGFR/ERBB2 inhibitor HKI-272. *Oncogene*, 26, 5023-7.
- MOUNTAIN, C. F. 1997. Revisions in the International System for Staging Lung Cancer. *Chest*, 111, 1710-7.
- RHODES, D. R., KALYANA-SUNDARAM, S., MAHAVISNO, V., VARAMBALLY, R., YU, J., BRIGGS, B. B., BARRETTE, T. R., ANSTET, M. J., KINCEAD-BEAL, C., KULKARNI, P., VARAMBALLY, S., GHOSH, D. & CHINNAIYAN, A. M. 2007. Oncomine 3.0: genes, pathways, and networks in a collection of 18,000 cancer gene expression profiles. *Neoplasia*, 9, 166-80.
- TAKEUCHI, T., TOMIDA, S., YATABE, Y., KOSAKA, T., OSADA, H., YANAGISAWA, K., MITSUDOMI, T. & TAKAHASHI, T. 2006. Expression profile-defined classification of lung adenocarcinoma shows close relationship with underlying major genetic changes and clinicopathologic behaviors. *J Clin Oncol*, 24, 1679-88.
- TANG, X., KADARA, H., BEHRENS, C., LIU, D. D., XIAO, Y., RICE, D., GAZDAR, A. F., FUJIMOTO, J., MORAN, C., VARELLA-GARCIA, M., LEE, J. J., HONG, W. K. & WISTUBA, II 2011. Abnormalities of the TTF-1 lineage-specific oncogene in NSCLC: implications in lung cancer pathogenesis and prognosis. *Clin Cancer Res*, 17, 2434-43.
